# Supplementary material
Source: Springer Nature journal article supplement (https://www.springermedizin.de/resource/supplementary/12936_2011_2052_MOESM1_ESM.pdf/9543420)

ETF LTF ACPR

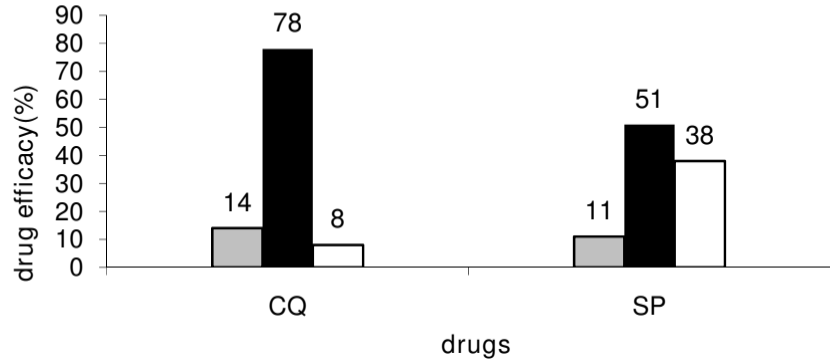

Supplement: MOESM1 [file 9543420]
